# Supplementary figures and images for: Autopsy Study Defines Composition and Dynamics of the HIV-1 Reservoir after Allogeneic Hematopoietic Stem Cell Transplantation with CCR5Δ32/Δ32 Donor Cells
Source: MDPI journal article supplement (doi:10.3390/v14092069), 2022-09-17

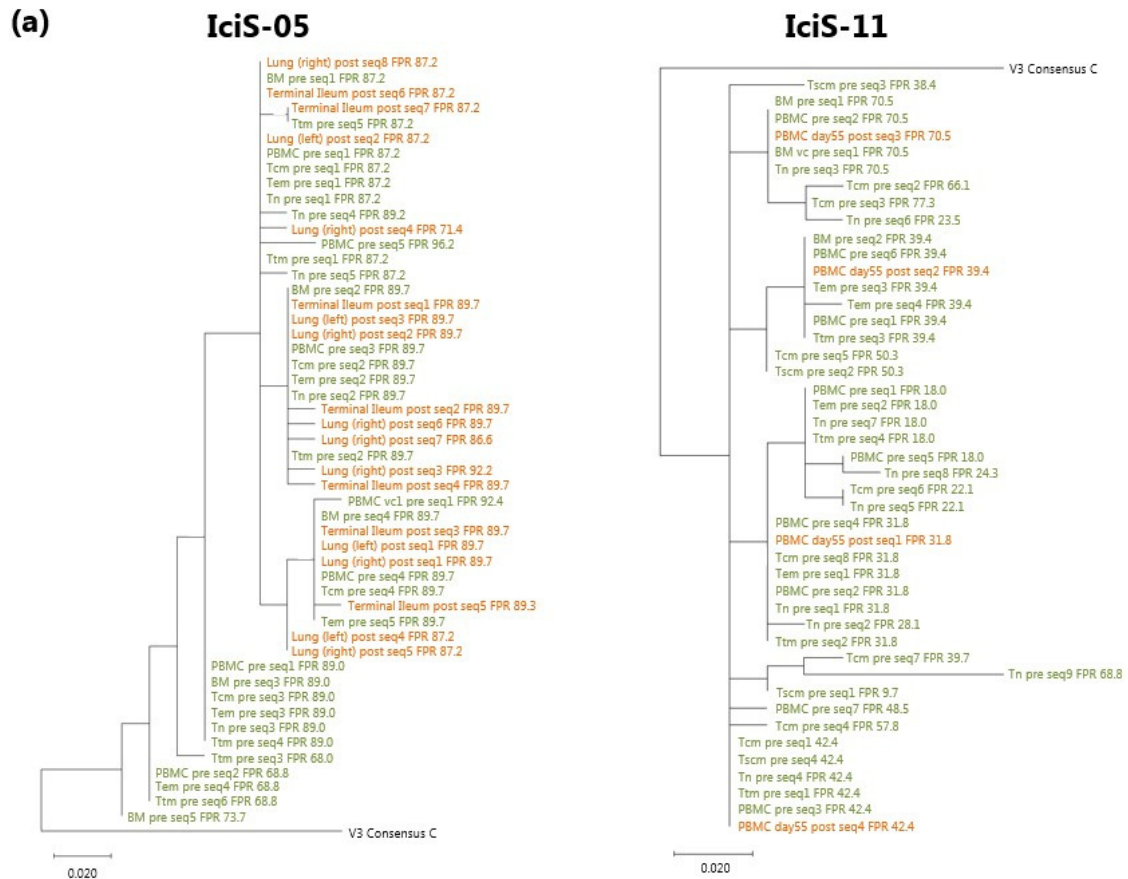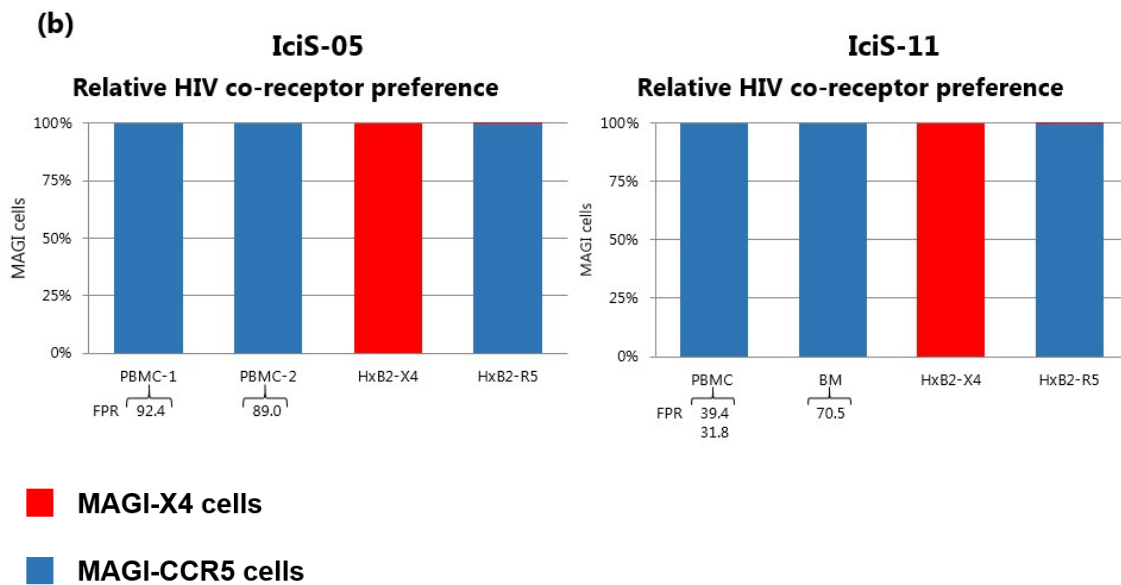

Figure S1: Phylogenetic analysis and relative coreceptor preference.

Supplement: s1 [file s1]
